# Supplementary material for: Chloroplast genome structure in Ilex (Aquifoliaceae)
Source: PubMed Central journal article supplement (PMC4932625; doi:10.1038/srep28559), 2016-07-05
Supplement: srep28559-s1.pdf [file srep28559-s1.pdf]

# Chloroplast genome structure in *Ilex* (Aquifoliaceae)

Xin Yao<sup>1,2+</sup>, Yun-hong Tan<sup>1+</sup>, Ying-ying Liu<sup>3</sup>, Yu Song<sup>1,2</sup>, Jun-bo Yang<sup>4\*</sup>, and  
Richard T. Corlett<sup>1\*</sup>

<sup>1</sup>Center for Integrative Conservation, Xishuangbanna Tropical Botanical Garden, Chinese Academy of Sciences, Mengla, 666303, China

<sup>2</sup>University of Chinese Academy of Sciences, Beijing, 100049, China

<sup>3</sup>Key Laboratory of Dai and Southern Medicine of Xishuangbanna Dai Autonomous Prefecture, Yunnan Branch of the Institute of Medicinal Plant Development, Chinese Academy of Medical Sciences, Jinghong, Yunnan, 666100, China

<sup>4</sup>Germplasm Bank of Wild Species, Kunming Institute of Botany, Chinese Academy of Sciences, Kunming, 650201, China

\*Correspondence: [jbyang@mail.kib.ac.cn](mailto:jbyang@mail.kib.ac.cn); [corlett@xtbg.org.cn](mailto:corlett@xtbg.org.cn)

+These authors contributed equally to this work

| No. | Star locus | <i>Ilex latifolia</i> | <i>Ilex</i> new sp. | <i>Ilex delavayi</i> | <i>Ilex szechwanensis</i> | <i>Ilex pubescens</i> | <i>Ilex polyneura</i> | <i>Ilex wilsonii</i> | Location                  | Region |
|-----|------------|-----------------------|---------------------|----------------------|---------------------------|-----------------------|-----------------------|----------------------|---------------------------|--------|
| 1   | 167        | d <sup>§</sup>        | d                   | d                    | d                         | d                     | d                     | i                    | <i>trnH-GUG(psbA)</i>     | LSC    |
| 2   | 242        | d                     | d                   | d                    | i                         | i                     | i                     | i                    | <i>trnH-GUG(psbA)</i>     | LSC    |
| 3   | 359        | i                     | i                   | i                    | d                         | i                     | i                     | i                    | <i>trnH-GUG(psbA)</i>     | LSC    |
| 4   | 424        | i                     | i                   | i                    | d                         | i                     | i                     | i                    | <i>trnH-GUG(psbA)</i>     | LSC    |
| 5   | 579        | i                     | i                   | i                    | i                         | i                     | i                     | d                    | <i>trnH-GUG(psbA)</i>     | LSC    |
| 6   | 1708       | i                     | i                   | d                    | i                         | i                     | i                     | i                    | <i>trnH-GUG(psbA)</i>     | LSC    |
| 7   | 1865       | i                     | i                   | i                    | d                         | i                     | i                     | i                    | <i>psbA(matK)</i>         | LSC    |
| 8   | 3907       | d                     | d                   | d                    | d                         | d                     | i                     | d                    | <i>matK(trnK-UUU)</i>     | LSC    |
| 9   | 4749       | i                     | i                   | i                    | i                         | d                     | d                     | d                    | <i>trnK-UUU(rps16)</i>    | LSC    |
| 10  | 4936       | i                     | i                   | i                    | d                         | i                     | i                     | i                    | <i>trnK-UUU(rps16)</i>    | LSC    |
| 11  | 4980       | i                     | i                   | i                    | i                         | d                     | i                     | i                    | <i>trnK-UUU(rps16)</i>    | LSC    |
| 12  | 4998       | i                     | i                   | i                    | d                         | i                     | i                     | i                    | <i>trnK-UUU(rps16)</i>    | LSC    |
| 13  | 5310       | i                     | i                   | i                    | i                         | i                     | i                     | d                    | <i>trnK-UUU(rps16)</i>    | LSC    |
| 14  | 5855       | d                     | i                   | i                    | i                         | i                     | i                     | i                    | <i>rps16(trnQ-UUG)</i>    | LSC    |
| 15  | 5912       | i                     | i                   | i                    | d                         | d                     | d                     | i                    | <i>rps16(trnQ-UUG)</i>    | LSC    |
| 16  | 5957       | i                     | i                   | i                    | i                         | d                     | d                     | i                    | <i>rps16(trnQ-UUG)</i>    | LSC    |
| 17  | 6643       | i                     | i                   | i                    | d                         | i                     | i                     | i                    | <i>rps16(trnQ-UUG)</i>    | LSC    |
| 18  | 7452       | i                     | i                   | i                    | d                         | i                     | i                     | i                    | <i>rps16(trnQ-UUG)</i>    | LSC    |
| 19  | 8603       | i                     | i                   | i                    | d                         | i                     | i                     | i                    | <i>psbK</i>               | LSC    |
| 20  | 8754       | d                     | d                   | i                    | d                         | d                     | d                     | d                    | <i>psbK</i>               | LSC    |
| 21  | 8946       | i                     | i                   | i                    | i                         | i                     | i                     | d                    | <i>psbK(psbI)</i>         | LSC    |
| 22  | 9058       | i                     | i                   | d                    | i                         | i                     | i                     | i                    | <i>psbK(psbI)</i>         | LSC    |
| 23  | 9443       | i                     | i                   | i                    | d                         | i                     | i                     | i                    | <i>psbI(trnS-GCU)</i>     | LSC    |
| 24  | 9671       | d                     | d                   | d                    | i                         | d                     | d                     | i                    | <i>trnS-GCU(trnG-GCC)</i> | LSC    |
| 25  | 11050      | d                     | d                   | i                    | d                         | d                     | d                     | d                    | <i>trnS-GCU(trnG-GCC)</i> | LSC    |
| 26  | 11180      | i                     | i                   | d                    | i                         | i                     | i                     | i                    | <i>trnR-UCU(atpA)</i>     | LSC    |
| 27  | 11197      | d                     | d                   | d                    | i                         | d                     | d                     | i                    | <i>trnR-UCU(atpA)</i>     | LSC    |
| 28  | 13816      | i                     | i                   | i                    | d                         | i                     | i                     | i                    | <i>atpF intron</i>        | LSC    |
| 29  | 15167      | i                     | i                   | d                    | d                         | d                     | d                     | d                    | <i>atpH(atpI)</i>         | LSC    |
| 30  | 15192      | d                     | d                   | d                    | d                         | d                     | d                     | i                    | <i>atpH(atpI)</i>         | LSC    |
| 31  | 17760      | i                     | i                   | i                    | i                         | i                     | d                     | i                    | <i>rps2(rpoC2)</i>        | LSC    |
| 32  | 22125      | i                     | i                   | d                    | i                         | i                     | i                     | i                    | <i>rpoC2</i>              | LSC    |
| 33  | 28661      | i                     | i                   | i                    | d                         | i                     | i                     | i                    | <i>rpoB(trnC-GCA)</i>     | LSC    |
| 34  | 30267      | i                     | i                   | i                    | d                         | i                     | i                     | i                    | <i>trnC-GCA(petN)</i>     | LSC    |
| 35  | 30778      | d                     | d                   | i                    | i                         | i                     | i                     | i                    | <i>petN(psbM)</i>         | LSC    |
| 36  | 30822      | d                     | d                   | i                    | d                         | d                     | d                     | d                    | <i>petN(psbM)</i>         | LSC    |
| 37  | 31057      | i                     | i                   | i                    | d                         | i                     | i                     | i                    | <i>petN(psbM)</i>         | LSC    |
| 38  | 32362      | i                     | i                   | d                    | d                         | i                     | i                     | d                    | <i>psbM(trnD-GUC)</i>     | LSC    |
| 39  | 32477      | d                     | d                   | d                    | d                         | d                     | d                     | i                    | <i>trnD-GUC</i>           | LSC    |
| 40  | 33060      | d                     | d                   | d                    | i                         | d                     | d                     | d                    | <i>trnE-UUC(trnT-GGU)</i> | LSC    |
| 41  | 33072      | d                     | d                   | i                    | d                         | d                     | d                     | d                    | <i>trnE-UUC(trnT-GGU)</i> | LSC    |

|    |       |   |   |   |   |   |   |   |                           |     |
|----|-------|---|---|---|---|---|---|---|---------------------------|-----|
| 42 | 33120 | d | d | d | d | i | i | i | <i>trnE-UUC(trnT-GGU)</i> | LSC |
| 43 | 33235 | i | i | d | i | i | i | i | <i>trnE-UUC(trnT-GGU)</i> | LSC |
| 44 | 33507 | d | d | d | i | i | i | i | <i>trnE-UUC(trnT-GGU)</i> | LSC |
| 45 | 34449 | i | i | d | i | i | i | i | <i>trnT-GGU(psbD)</i>     | LSC |
| 46 | 38038 | i | i | i | i | d | d | i | <i>trnS-UGA(lhbA)</i>     | LSC |
| 47 | 44226 | i | i | i | i | d | i | i | <i>psaA(ycf3)</i>         | LSC |
| 48 | 46143 | d | d | d | d | d | d | i | <i>ycf3 intron2</i>       | LSC |
| 49 | 46663 | i | i | i | i | i | d | d | <i>ycf3 intron2</i>       | LSC |
| 50 | 46666 | i | i | d | i | d | d | d | <i>ycf3 intron2</i>       | LSC |
| 51 | 47067 | d | d | d | i | d | d | d | <i>ycf3(trnS-GGA)</i>     | LSC |
| 52 | 47240 | i | i | i | d | i | i | i | <i>ycf3(trnS-GGA)</i>     | LSC |
| 53 | 48367 | d | d | d | i | i | i | d | <i>rps4(trnT-UGU)</i>     | LSC |
| 54 | 48460 | d | d | d | d | d | d | i | <i>rps4(trnT-UGU)</i>     | LSC |
| 55 | 48559 | i | i | i | d | i | i | i | <i>rps4(trnT-UGU)</i>     | LSC |
| 56 | 48935 | i | i | i | i | i | i | d | <i>trnT-UGU(trnL-UAA)</i> | LSC |
| 57 | 49052 | i | i | i | d | i | i | i | <i>trnT-UGU(trnL-UAA)</i> | LSC |
| 58 | 49137 | i | i | d | i | i | i | i | <i>trnT-UGU(trnL-UAA)</i> | LSC |
| 59 | 49212 | i | i | i | d | d | d | d | <i>trnT-UGU(trnL-UAA)</i> | LSC |
| 60 | 49865 | d | d | d | d | i | i | d | <i>trnL-UAA intron</i>    | LSC |
| 61 | 49965 | d | d | d | d | d | d | i | <i>trnL-UAA intron</i>    | LSC |
| 62 | 50078 | i | i | d | i | i | i | i | <i>trnL-UAA intron</i>    | LSC |
| 63 | 50429 | d | d | i | i | i | i | i | <i>trnL-UAA(trnF-GAA)</i> | LSC |
| 64 | 51315 | d | d | d | d | i | i | d | <i>trnf-GAA(ndhJ)</i>     | LSC |
| 65 | 53169 | i | i | d | i | i | i | i | <i>ndhC(trnV-UAC)</i>     | LSC |
| 66 | 53294 | d | d | d | i | d | d | i | <i>ndhC(trnV-UAC)</i>     | LSC |
| 67 | 53373 | i | i | i | i | i | i | d | <i>ndhC(trnV-UAC)</i>     | LSC |
| 68 | 59647 | i | i | i | i | d | d | i | <i>rbcL(accD)</i>         | LSC |
| 69 | 59804 | i | i | i | d | i | i | i | <i>rbcL(accD)</i>         | LSC |
| 70 | 59905 | i | i | i | i | d | i | i | <i>rbcL(accD)</i>         | LSC |
| 71 | 60485 | i | i | i | d | i | i | i | <i>accD</i>               | LSC |
| 72 | 62033 | d | d | d | d | d | d | i | <i>accD(psaI)</i>         | LSC |
| 73 | 62655 | i | i | i | d | i | i | d | <i>psaI(ycf4)</i>         | LSC |
| 74 | 63619 | i | i | d | i | i | i | i | <i>ycf4(cemA)</i>         | LSC |
| 75 | 63905 | d | d | d | i | i | i | i | <i>ycf4(cemA)</i>         | LSC |
| 76 | 66908 | i | i | i | d | i | i | i | <i>petA(psbJ)</i>         | LSC |
| 77 | 66971 | d | i | i | i | i | i | i | <i>petA(psbJ)</i>         | LSC |
| 78 | 66975 | i | i | i | i | d | d | i | <i>petA(psbJ)</i>         | LSC |
| 79 | 69461 | i | d | i | i | i | i | i | <i>petL(petG)</i>         | LSC |
| 80 | 69788 | d | d | d | i | d | d | d | <i>petG(trnW-CCA)</i>     | LSC |
| 81 | 73500 | i | i | i | d | d | d | d | <i>rpsI2 intron1</i>      | LSC |
| 82 | 75167 | i | i | i | d | i | i | i | <i>clpP intron2</i>       | LSC |
| 83 | 78864 | d | d | i | d | d | d | d | <i>psbH(petB)</i>         | LSC |
| 84 | 80061 | i | i | i | i | i | i | d | <i>petB(petD)</i>         | LSC |
| 85 | 80811 | d | i | i | i | i | i | i | <i>petB(petD)</i>         | LSC |

|     |        |   |   |   |   |   |   |   |                           |     |
|-----|--------|---|---|---|---|---|---|---|---------------------------|-----|
| 86  | 83236  | i | i | d | d | d | d | d | <i>rps11(rpl36)</i>       | LSC |
| 87  | 84398  | i | i | i | i | i | d | i | <i>rpl36</i>              | LSC |
| 88  | 85488  | i | d | i | d | i | i | i | <i>rpl16(rps3)</i>        | LSC |
| 89  | 86339  | d | d | d | i | i | i | i | <i>rpl16(rps3)</i>        | LSC |
| 90  | 97804  | i | i | i | d | i | i | i | <i>trnL-CAA(ndhB)</i>     | IRb |
| 91  | 97912  | i | i | i | d | i | i | i | <i>trnL-CAA(ndhB)</i>     | IRb |
| 92  | 98080  | i | i | i | i | d | d | i | <i>trnL-CAA(ndhB)</i>     | IRb |
| 93  | 103072 | i | i | i | d | i | i | i | <i>rps12 intron2</i>      | IRb |
| 94  | 103125 | d | d | d | d | i | d | d | <i>rps12 intron2</i>      | IRb |
| 95  | 111186 | i | i | i | i | i | d | i | <i>rrn4.5</i>             | IRb |
| 96  | 112381 | i | i | i | d | i | i | i | <i>trnR-ACG(trnN-GUU)</i> | IRb |
| 97  | 113834 | i | i | i | i | i | i | d | <i>ycf1</i>               | IRb |
| 98  | 116932 | i | i | i | d | i | i | i | <i>ndhF(rpl32)</i>        | SSC |
| 99  | 117489 | d | i | i | i | i | i | i | <i>rpl33(trnL-UAG)</i>    | SSC |
| 100 | 117563 | d | i | i | i | i | i | i | <i>rpl34(trnL-UAG)</i>    | SSC |
| 101 | 118224 | d | d | d | i | d | d | d | <i>trnL-UAG</i>           | SSC |
| 102 | 124467 | d | d | d | d | d | d | i | <i>ndhA intron</i>        | SSC |
| 103 | 124669 | d | d | d | d | d | d | i | <i>ndhA intron</i>        | SSC |
| 104 | 127363 | i | i | i | i | i | i | d | <i>rps15</i>              | SSC |
| 105 | 127403 | i | i | i | d | i | i | i | <i>rps15</i>              | SSC |
| 106 | 132661 | i | i | i | i | i | i | d | <i>ycf1</i>               | IRa |
| 107 | 134111 | i | i | i | d | i | i | i | <i>trnN-GUU(trnR-ACG)</i> | IRa |
| 108 | 135248 | i | i | i | i | i | d | i | <i>rrn5(rrn4.5)</i>       | IRa |
| 109 | 143358 | d | d | d | d | i | d | d | <i>trnV-GAC(rps7)</i>     | IRa |
| 110 | 143420 | i | i | i | d | i | i | i | <i>trnV-GAC(rps7)</i>     | IRa |
| 111 | 148415 | i | i | i | i | d | d | i | <i>ndhB(trnL-CAA)</i>     | IRa |
| 112 | 148584 | i | i | i | d | i | i | i | <i>ndhB(trnL-CAA)</i>     | IRa |
| 113 | 148683 | i | i | i | d | i | i | i | <i>ndhB(trnL-CAA)</i>     | IRa |

**Supplementary Table S1.** List of indels in the seven *Ilex* species using *Ilex latifolia*

as reference. <sup>s</sup>i means insertion, and d means deletion.

|                  |         | <b>f</b>             | <b>r</b>             |
|------------------|---------|----------------------|----------------------|
| <i>Ilex</i>      | IRa-LSC | AGAGCCGGATCTAAGCGTTG | CTAGTAGAGGGGGCGGATGT |
|                  | LSC-IRb | TGGCCTACCATACGGTCTGT | GTCGGACAAGTGGGGAATGT |
|                  | IRb-SSC | AGGGAGAATACCGTCACCCA | CGGGAATAAGGGGATTGGCT |
|                  | SSC-IRa | TGTGGACAGGGACATCCTTC | ACTTCCGAAACGAAGGGGAC |
| <i>Helwingia</i> | IRa-LSC | AGAGCCGGATCTAAGCGTTG | CTAGTAGAGGGGGCGGATGT |
|                  | LSC-IRb | TGGCCTACCATACGGTCTGT | GTCGGACAAGTGGGGAATGT |
|                  | IRb-SSC | AGGGAGAATACCGTCACCCA | CGGGAATAAGGGGATTGGCT |
|                  | SSC-IRa | TGTGGACAGGGACATCCTTC | ACTTCCGAAACGAAGGGGAC |

**Supplementary Table S2.** Primers validating four junction regions in resulting chloroplast genome of *Ilex pubescens* and *Helwingia himalaica*.

| <b>Dataset</b>              | <b>Length (bp)</b> | <b>Selected substitution models</b> |
|-----------------------------|--------------------|-------------------------------------|
| Complete chloroplast genome | 161,798            | TVM+G                               |
| Coding region               | 90,632             | TVM+I+G                             |
| Introns and spacers         | 70,230             | TVM+G                               |
| LSC                         | 90,236             | GTR+I+G                             |
| IR                          | 26,161             | TIM1+I+G                            |
| SSC                         | 19,116             | GTR+G                               |

**Supplementary Table S3.** Length of each dataset matrix used for phylogeny construction and the best-fitting models tested by jModelTest for Bayesian Inference and Maximum Likelihood analyses.
